# Supplementary material
Source: publisher figshare collection journal article supplement (https://karger.figshare.com/ndownloader/files/40872704)
Supplement: Supplementary file 1 [file 40872704]

| **Supplementary table 1: Proportion of patients at baseline with concentrations outside reference range / non-pathological values** | | | |
| --- | --- | --- | --- |
| **Variable** | **Population** | **Number of patients with value outside reference range / normal values** | **Percentage (%)** |
| Hemoglobin | 26 | 24 | 92.3 |
| Serum Ferritin | 26 | 16 | 61.5 |
| Transferrin saturation | 26 | 20 | 76.9 |
| CRP / mg/L | 26 | 11 | 42.3 |
| urinary PCR | 24 | 14 | 58.3 |
| 24hr urinary phosphate | 26 | 0 | 0.0 |
| FEP | 26 | 24 | 92.3 |
| Calcium | 26 | 1 | 3.8 |
| Phosphate | 26 | 4 | 15.4 |
| PTH | 26 | 19 | 73.1 |
| 1,25 (OH)2 Vitamin D | 26 | 14 | 53.8 |
| ALP | 26 | 8 | 30.8 |
| BALP | 26 | 8 | 30.8 |
| CTx | 26 | 20 | 76.9 |
| P1NP | 26 | 15 | 57.7 |
| iFGF-23 | 26 | 21 | 80.8 |
| NT-proBNP | 26 | 21 | 80.8 |
| Troponin T | 24 | 24 | 100.0 |
| PWV | 23 | 18 | 78.3 |
| PR interval | 20 | 3 | 15.0 |
| QRS interval | 25 | 6 | 24.0 |
| QTc interval | 25 | 10 | 40.0 |
| ALP = alkaline phosphatase, BALP = bone specific ALP, CRP = C-reactive protein, CTx = C-terminal cross-linked telopeptide,, FEP = fractional excretion of phosphate, PTH = parathyroid hormone, PWV = Pulse wave velocity, P1NP = procollagen type 1 N-terminal propeptide, urinary PCR = urinary protein:creatinine ratio | | | |
